# Supplementary material
Source: Springer Nature journal article supplement (https://www.springermedizin.de/resource/supplementary/12888_2012_1216_MOESM1_ESM.pdf/9480650)

**A**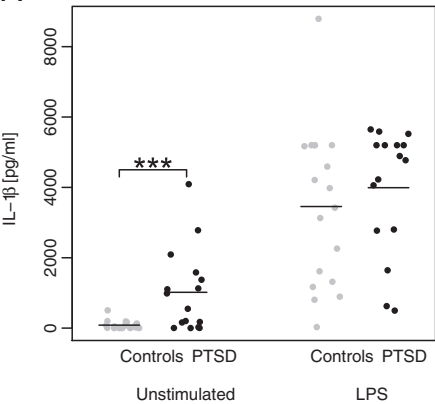**B**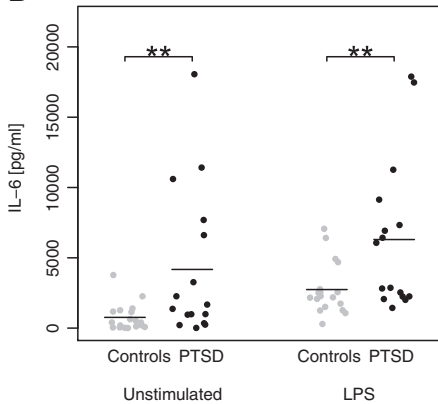**C**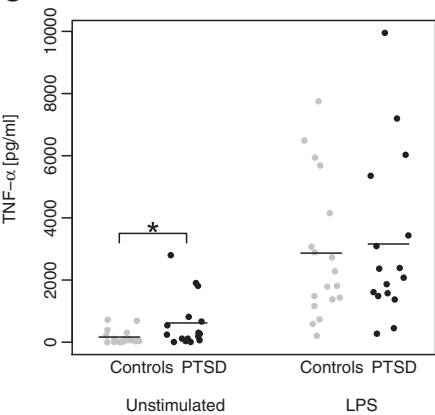

Supplement: MOESM1 [file 9480650]
